# L- and S-endoglin differentially modulate TGF $\beta$ 1 signaling mediated by ALK1 and ALK5 in L<sub>6</sub>E<sub>9</sub> myoblasts

Soraya Velasco<sup>1</sup>, Patricia Alvarez-Muñoz<sup>1</sup>, Miguel Pericacho<sup>1</sup>, Peter ten Dijke<sup>2</sup>, Carmelo Bernabéu<sup>3</sup>, José M. López-Novoa<sup>1</sup> and Alicia Rodríguez-Barbero<sup>1,\*</sup>

<sup>1</sup>Instituto 'Reina Sofía' de Investigación Nefrológica, Departamento de Fisiología y Farmacología, Universidad de Salamanca, and Red de Investigación en Enfermedades Renales (RedinRen), Salamanca, Spain

<sup>2</sup>Department of Molecular Cell Biology, Leiden University Medical Center, Leiden, The Netherlands

<sup>3</sup>Centro de Investigaciones Biológicas (CSIC), and Center for Biomedical Research on Rare Diseases (CIBERER), Madrid, Spain

\*Author for correspondence (e-mail: barberoa@usal.es)

Accepted 14 January 2008

Journal of Cell Science 121, 913-919 Published by The Company of Biologists 2008

doi:10.1242/jcs.023283

## Summary

TGF $\beta$  regulates cellular processes by binding to type I and type II TGF $\beta$  receptors (T $\beta$ RI and T $\beta$ RII, respectively). In addition to these signaling receptors, endoglin is an accessory TGF $\beta$  receptor that regulates TGF $\beta$  signaling. Although there are two different alternatively spliced isoforms of endoglin, L-endoglin (L, long) and S-endoglin (S, short), little is known about the effects of S-endoglin isoform on TGF $\beta$  signaling. Here, we have analyzed the TGF $\beta$ 1 signaling pathways and the effects of L- and S-endoglin in endoglin-deficient L<sub>6</sub>E<sub>9</sub> cells. We found that TGF $\beta$  activates two distinct T $\beta$ RI-Smad signaling pathways: ALK1-Smad1-Id1 and ALK5-Smad2-PAI1, in these cells. Interestingly, L-endoglin enhanced the ALK1-Id1 pathway,

while S-endoglin promoted the ALK5-PAI1 route. These effects on signaling are supported by biological effects on TGF $\beta$ 1-induced collagen I expression and inhibition of cell proliferation. Thus, while L-endoglin decreased TGF $\beta$ 1-induced collagen I and CTGF expression and increased TGF $\beta$ 1-induced proliferation, S-endoglin strongly increased TGF $\beta$ 1-induced collagen I and CTGF expression, and reduced TGF $\beta$ 1-induced cell proliferation.

Key words: TGF $\beta$ , L-endoglin, S-endoglin ALK1, ALK5, Id1, PAI1, Smads, Collagen I, Proliferation

## Introduction

Transforming growth factor  $\beta$  (TGF $\beta$ ) is a family of multifunctional growth factor that regulates biological processes controlling the physiology of organs and tissues. TGF $\beta$  proteins regulate cell proliferation, migration, extracellular matrix (ECM) production and the differentiation of a wide variety of cell types (Piek et al., 1999), and play a pivotal role during embryonic development and adult homeostasis (Massague, 2000). TGF $\beta$  family members elicit cellular responses by binding to a heteromeric complex of specific type I and II serine/threonine kinase receptors and their downstream nuclear effectors, termed Smads (Shi and Massague, 2003). TGF $\beta$  type I receptor (T $\beta$ RI), also known as activin receptor-like kinase (CAVRL1, hereafter referred to as ALK), acts downstream of TGF $\beta$  type II (T $\beta$ RII) receptor and propagates the signal to the nucleus by phosphorylating specific members of the Smad family, receptor-regulated (R)-Smads, at their C-terminal serine residues. Phosphorylated R-Smads form complexes with the common partner (Co)-Smad, i.e. Smad4, which accumulate in the nucleus where they participate in transcriptional regulation of target genes (Massague and Gomis, 2006). In most cells cell types, TGF $\beta$ 1 binds to the ubiquitously expressed ALK5 receptor that activates Smad2 and Smad3 (Massague and Gomis, 2006). In a few other cell types, TGF $\beta$  activates ALK1 in the presence of functional ALK5, resulting in phosphorylation of Smad1 and Smad5 (Goumans et al., 2002; Lebrin et al., 2005; Scherner et al., 2007). It has been proposed that ALK1 activation triggers proliferation and migration, whereas ALK5 activation has the opposite effects in endothelial cells

(Goumans et al., 2002; Lebrin et al., 2005). However, other authors have reported rather different results (David et al., 2007). Besides these classical signaling receptors, two accessory receptors, i.e. betaglycan (T $\beta$ RIII) and endoglin (CD105), have been described (Piek et al., 1999; Shi and Massague, 2003; Gougos and Letarte, 1990; Duff et al., 2003). Endoglin binds different members of the TGF $\beta$  superfamily in the presence of the signaling receptors types I and II (Cheifetz et al., 1992; Yamashita et al., 1994; Letamendia et al., 1998). The functional interaction between endoglin and TGF $\beta$  receptors has been thoroughly analyzed in endothelial cells (Lebrin et al., 2004; Lebrin et al., 2005; Blanco et al., 2005) and only recently in L<sub>6</sub>E<sub>9</sub> myoblasts (Scherner et al., 2007). Molecular cloning of the human endoglin cDNA has demonstrated the existence of two protein variants, arising by alternative splicing. L-endoglin, the predominant isoform, has a cytoplasmic domain of 47 residues, whereas the minor isoform, S-endoglin, contains a cytoplasmic tail of only 14 amino acids (Bellon et al., 1993; Perez-Gomez et al., 2005). Both endoglin forms are able to bind ligand (Bellon et al., 1993), but differ in their level of phosphorylation (Lastres et al., 1994), and in their capacity to regulate certain TGF $\beta$ -dependent responses (Lastres et al., 1996). As L-endoglin is the predominant isoform, its role in the TGF $\beta$  system has been analyzed by several laboratories. However, little is known about the function of S-endoglin (Perez-Gomez et al., 2005; Lastres et al., 1994; Lastres et al., 1996). Here, we analyze the effect of L- and S-endoglin on TGF $\beta$ 1 signaling and on collagen I synthesis and cell proliferation in L<sub>6</sub>E<sub>9</sub> myoblasts.

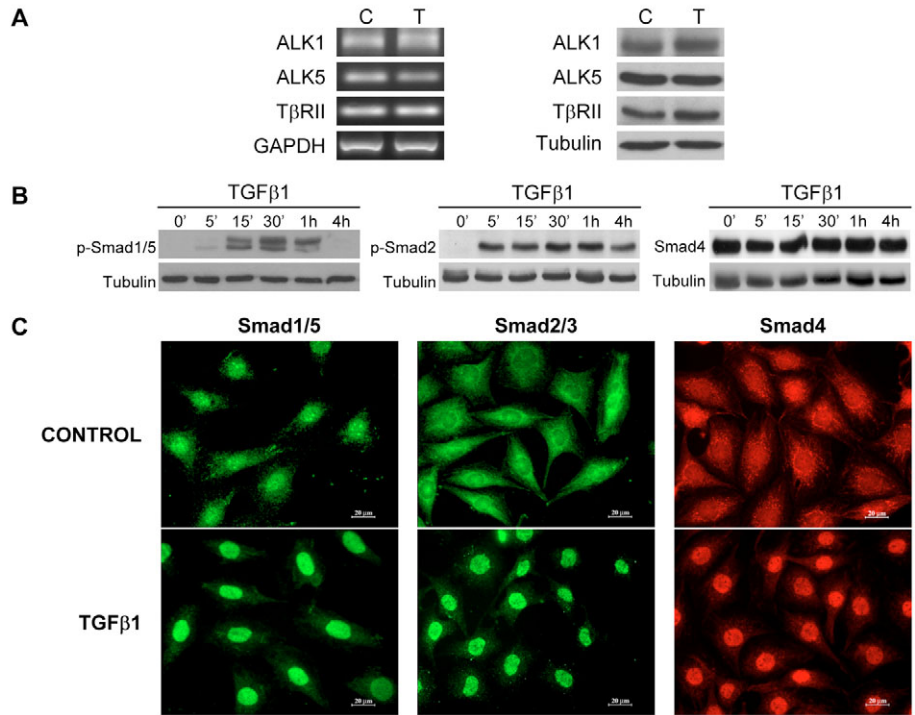

**Fig. 1.** Expression of TGF $\beta$  receptors and Smads in L<sub>6</sub>E<sub>9</sub> cells. L<sub>6</sub>E<sub>9</sub> cells were serum starved for 24 hours before TGF $\beta$ 1 treatment. (A) The expression of ALK1, ALK5 and T $\beta$ RII from control (C) or 500 pM TGF $\beta$ 1-treated (T) cells (24 hours) was analyzed by RT-PCR and western blot. (B) Myoblasts were stimulated with TGF $\beta$ 1 for the indicated time periods. Total proteins extracts were analyzed by western blot with anti-phospho-Smad1, anti-phospho-Smad2, anti-Smad2/3 and anti-Smad4 antibodies. Loading controls included GAPDH,  $\beta$ -actin and tubulin. A representative blot from three independent experiments is shown. (C) Immunofluorescence of Smad1/5, Smad2/3 and Smad4 in L<sub>6</sub>E<sub>9</sub> cells untreated or treated with TGF $\beta$ 1 for 24 hours.

## Results

### TGF $\beta$ 1 activates ALK1 and ALK5 signaling pathways

The presence of ALK1, ALK5 and T $\beta$ RII mRNA and protein expression in L<sub>6</sub>E<sub>9</sub> cells was clearly detected by RT-PCR and western blot (Fig. 1A). Furthermore, they were unchanged after 24 hours of TGF $\beta$ 1 treatment. As evidenced by western blot analysis of total cellular extracts (Fig. 1B) or isolated nuclei (data not shown), stimulation of L<sub>6</sub>E<sub>9</sub> with TGF $\beta$ 1 resulted in phosphorylation and nuclear accumulation of Smad1/5 (Fig. 1B) and Smad2/3 (Fig. 1B). Smad4 expression in total cellular extracts was unchanged after TGF $\beta$ 1 treatment (Fig. 1B), but was increased in nuclear extracts (data not shown). Immunofluorescence studies revealed that under basal conditions Smad1/5, as well as Smad2/3 and Smad4 are homogeneously distributed in the cytoplasm with perinuclear and nuclear accumulation. However, after 30 minutes of stimulation with TGF $\beta$ 1, Smad1/5, Smad2/3 and Smad4 accumulated mainly in the nucleus (Fig. 1C). TGF $\beta$ -induced Smad phosphorylation was abrogated in the presence of the synthetic ALK5 inhibitor SB431542 (Fig. 2A). We found an increased expression of the specific downstream target of TGF $\beta$ -ALK1 pathway Id1 (Goumans et al., 2002) in L<sub>6</sub>E<sub>9</sub> cells (Fig. 2B). Id1 expression induced by 500 pM

TGF $\beta$ 1 was maximal at 1 hour and decreased after 4 hours (data not shown). We also found a small activation of the (BRE)<sub>2</sub>-Luc reporter upon 24 hours of TGF $\beta$ 1 treatment (Fig. 2C). Expression of the specific downstream target of TGF $\beta$ -ALK5 pathway, plasminogen activator inhibitor 1 (Serpine1, hereafter referred to as PAI1) (Goumans et al., 2002), was strongly induced by 500 pM TGF $\beta$ 1 (Fig. 2D). As shown in Fig. 2E, the reporter activity (CAGA)<sub>12</sub>-Luc was powerfully stimulated by TGF $\beta$ 1 treatment for

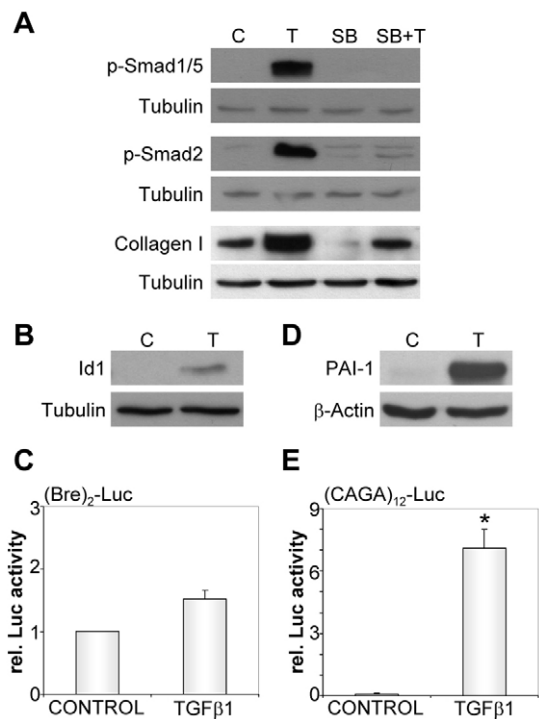

**Fig. 2.** TGF $\beta$ 1-ALK1 and TGF $\beta$ 1-ALK5 signaling pathways in L<sub>6</sub>E<sub>9</sub> cells. Cells were serum starved for 24 hours before TGF $\beta$ 1 treatments (30 minutes for p-Smads, 1 hour for Id1 and 24 hours for PAI1). (A) Cells were treated with the ALK5 inhibitor SB431542 (SB, 5  $\mu$ M) 1 hour before treatment with TGF $\beta$ 1. Whole-cell extracts were analyzed by western blot with anti-pSmad1, anti-pSmad2 and collagen I. Total protein extracts from control (C) or TGF $\beta$ 1-treated (T) myoblasts (1 hour) were analyzed by western blot with anti-Id1 (B) and anti-PAI1 (D). L<sub>6</sub>E<sub>9</sub> were transiently transfected with (Bre)<sub>2</sub>-Luc (C), and (CAGA)<sub>12</sub>-Luc (E) reporters; cells were incubated or not with TGF $\beta$ 1 for 24 hours, before measuring the luciferase activity. Results are represented as fold induction of the TGF $\beta$ 1 treated over the untreated counterparts. The histogram represents the mean of three independent experiments. \**P* < 0.05, Student's *t*-test.

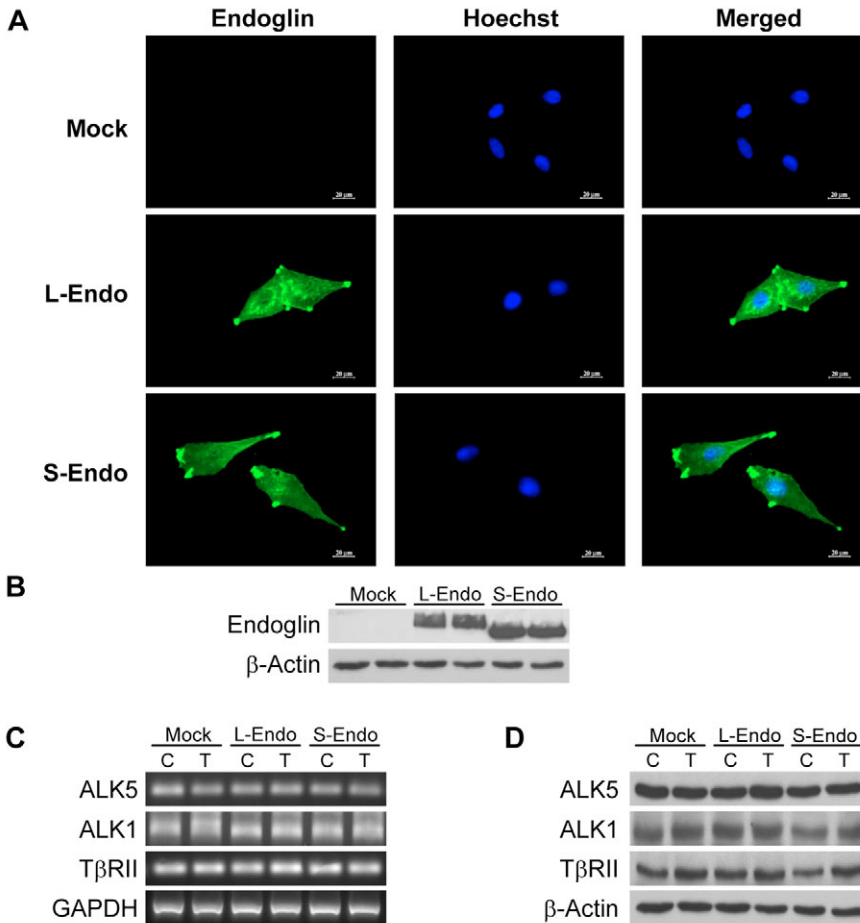

**Fig. 3.** L- and S-endoglin expression and their effects on TGF $\beta$  receptors. (A) Immunofluorescence and (B) western blot of endoglin in L<sub>6</sub>E<sub>9</sub> mock, L-endoglin (L-Endo) and S-endoglin (S-Endo). (C,D) Mock-, L-Endo- and S-Endo-transfected cells were serum starved for 24 hours before TGF $\beta$ 1 treatment. The expression of ALK1, ALK5 and T $\beta$ RII in control (C), or TGF $\beta$ 1-treated (T) cells was analyzed by RT-PCR (C) and western blot (D). A representative blot from three independent experiments is shown.

24 hours. These experiments revealed that TGF $\beta$ 1 was sufficient to activate Smad2 and Smad1/5. Interestingly, both phosphorylation of Smad2 and Smad1/5 were blocked in the presence of SB431542 (Fig. 2A). Because ALK1 is insensitive to this inhibitor (Laping et al., 2002), this finding indicated that ALK1 signaling itself is ALK5 dependent in L<sub>6</sub>E<sub>9</sub> cells. In addition, TGF $\beta$ -induced collagen I expression was reduced in the presence of SB431542 (Fig. 2A).

L- and S-endoglin expression in L<sub>6</sub>E<sub>9</sub> cells, and their effect on TGF $\beta$  receptors and Smad activation

Ectopic expression of L- and S-endoglin in L<sub>6</sub>E<sub>9</sub> transfectants was assessed by immunofluorescence and western blot analysis. Both L- and S-endoglin were found to be homogeneously distributed on the cell membrane and accumulated at the adhesion points to the substratum (Fig. 3A). L- and S-endoglin were detected also by western blot (Fig. 3B). As we already reported (Obreo et al., 2004), no endoglin expression was found in mock L<sub>6</sub>E<sub>9</sub> cells. RT-PCR and western blot analysis revealed that L- or S-endoglin expression in L<sub>6</sub>E<sub>9</sub> cells did not modify ALK1, ALK5 or T $\beta$ RII mRNA (Fig. 3C) and protein expression (Fig. 3D). Stimulation of mock, L- or S-endoglin L<sub>6</sub>E<sub>9</sub> myoblasts with TGF $\beta$ 1 resulted in Smad1, Smad2 and Smad3 phosphorylation (Fig. 4A). No significant differences were found in phosphorylated Smad1, Smad2 and Smad3 between mock, L- or S-endoglin in untreated cells (data not shown). TGF $\beta$ 1-induced Smad3 phosphorylation was higher in S-endoglin cells than in L-endoglin and mock, whereas no significant differences were found in phospho-Smad2 (Fig. 4A). TGF $\beta$ 1-induced Smad1, Smad2

and Smad3 phosphorylation was abrogated in the presence of the synthetic ALK5 inhibitor SB431542 in mock, L- and S-endoglin-transfected cells (Fig. 4B).

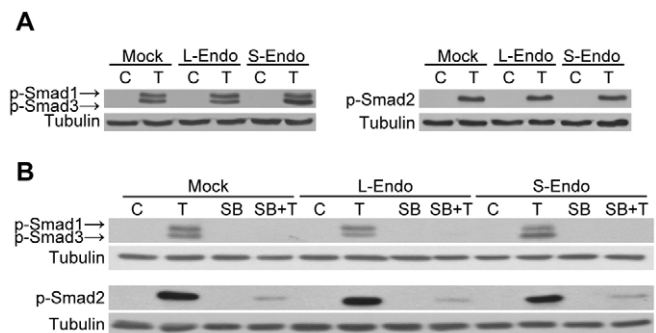

**Fig. 4.** Effects of L- and S-endoglin on Smad phosphorylation. Mock-, L-Endo- and S-Endo-transfected cells were serum starved for 24 hours before 30 minutes of TGF $\beta$ 1 treatment. (A) Total protein extracts from control (C) or TGF $\beta$ 1-treated (T) myoblasts were analyzed by western blot with anti-phospho-Smad1/3 or anti-phospho-Smad2 antibodies; anti-tubulin was used as a loading control. (B) Mock-, L-Endo- and S-Endo-transfected cells were treated with the ALK5 inhibitor SB431542 (SB, 5  $\mu$ M) 1 hour before treatment with TGF $\beta$ 1. Total protein extracts from control (C) or TGF $\beta$ 1-treated (T) myoblasts were analyzed by western blot with anti-phospho-Smad1/3, anti-phospho-Smad2 and anti-tubulin antibodies. A representative blot from three independent experiments is shown.

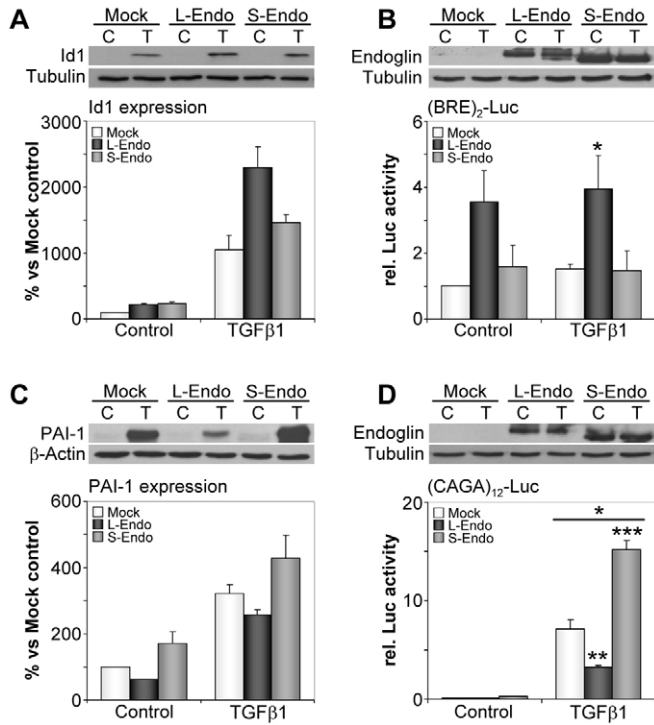

**Fig. 5.** Effects of L- and S-endoglin on TGF $\beta$ 1-ALK1 and TGF $\beta$ 1-ALK5 signaling pathways. Cells were serum starved for 24 hours before TGF $\beta$ 1 treatment. Total protein extracts from control (C) or TGF $\beta$ 1-treated (T) myoblasts analyzed by western blot with anti-Id1 (A) and anti-PAI1 (C). Measures of densitometry of each band were performed and relative values are represented. Id1 and PAI1 histogram represents the mean of three different extracts. (B,D) Western blots of endoglin in L<sub>6</sub>E<sub>9</sub> mock, L-endoglin (L-Endo) and S-endoglin (S-Endo). L<sub>6</sub>E<sub>9</sub> cells were transiently transfected with (BRE)<sub>2</sub>-Luc reporter (\**P*<0.05 compared with mock and S-Endo) (B), and (CAGA)<sub>12</sub>-Luc reporter (\**P*<0.05 TGF $\beta$ 1 compared with control; \*\**P*<0.05 compared with mock and S-Endo; \*\*\**P*<0.05 compared with mock and L-Endo). (D) Cells were incubated or not with TGF $\beta$ 1 for 24 hours before measuring the luciferase activity.

#### Differential effects of L- and S-endoglin on ALK1 and ALK5 signaling pathways

TGF $\beta$ 1-induced Id1 expression in L-endoglin-transfected L<sub>6</sub>E<sub>9</sub> was significantly higher than in mock cells (Fig. 5A). In addition, Id1 expression in L-endoglin was higher than in S-endoglin cells (Fig. 5A). Accordingly, the trans-activation activity of the (BRE)<sub>2</sub>-Luc reporter was 3.5 times higher in L-endoglin than in mock cells, whereas S-endoglin (BRE)<sub>2</sub>-Luc reporter activity was 1.5 times higher than in mock cells (Fig. 5B). However, the (BRE)<sub>2</sub>-Luc reporter was barely increased by TGF $\beta$ 1 (Fig. 5B). Fig. 5B also shows a representative western blot of both L- and S-endoglin expression in L<sub>6</sub>E<sub>9</sub> myoblasts. Altogether, these results show that L-endoglin expression promotes signaling through the ALK1 receptor.

TGF $\beta$ -induced PAI1 expression was also modified by endoglin expression. Whereas L-endoglin significantly decreased PAI1 expression, S-endoglin strongly augmented this response (Fig. 5C). As shown in Fig. 5D, the reporter activity of (CAGA)<sub>12</sub>-Luc was stimulated upon TGF $\beta$  treatment in mock cells, whereas the TGF $\beta$ -mediated response of this ALK5-dependent reporter was diminished by L-endoglin and strongly enhanced by S-endoglin. Fig. 5D also shows a representative western blot of both L- and S-endoglin expression in L<sub>6</sub>E<sub>9</sub> myoblasts. Thus, S-endoglin expression in L<sub>6</sub>E<sub>9</sub> promotes signaling through the ALK5 receptor.

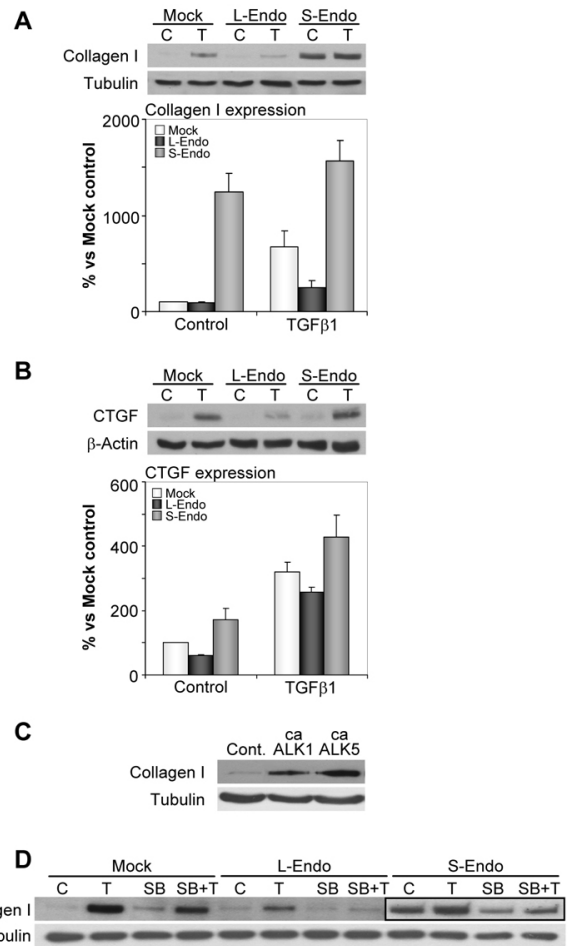

**Fig. 6.** Effect of L- and S-endoglin on collagen I and CTGF expression. (A,B) Mock, L- and S-endoglin cells were treated (T) or not (C) with TGF $\beta$ 1 for 24 hours in serum-free medium. Total protein extracts were analyzed by western blot using a specific antibody for collagen I (A) or CTGF (B). Measures of densitometry of each band were performed and relative values are represented. Collagen I and CTGF histogram represents the mean of three different extracts. (C) L<sub>6</sub>E<sub>9</sub> cells were transfected with a vector expressing either caALK1 or caALK5, and collagen expression analyzed by western blot. (D) Mock, L-Endo and S-Endo-transfected cells were treated with the ALK5 inhibitor SB431542 (SB, 5  $\mu$ M) 1 hour before treatment with TGF $\beta$ 1. Total protein extracts from control (C) or TGF $\beta$ 1-treated (T) myoblasts were analyzed by western blot with anti-collagen I and anti-tubulin antibodies. A representative blot from three independent experiments is shown. The blot of the S-endoglin samples is under-exposed in order to visualize the differences caused by the SB431542 treatment.

#### Differential effects of L- and S-endoglin on collagen I accumulation

The effect of L- and S-endoglin on collagen I expression was analyzed in L<sub>6</sub>E<sub>9</sub> cells. In basal conditions, collagen I was markedly augmented in S-endoglin but not in L-endoglin cells (Fig. 6A). Collagen I levels increased after TGF $\beta$ 1 treatment in both mock, L- and S-endoglin L<sub>6</sub>E<sub>9</sub> cells (Fig. 6A), although the increase was much higher in S-endoglin and lower in L-endoglin cells than in mock L<sub>6</sub>E<sub>9</sub> cells.

To investigate the role of ALK1 and ALK5 signaling pathways on collagen I accumulation, we transfected L<sub>6</sub>E<sub>9</sub> cells with a vector expressing either constitutively active (ca) ALK1 or ALK5, and analyzed the effect on collagen I expression. caALK1 and caALK5



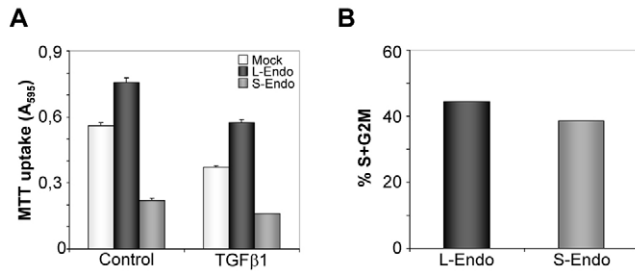

**Fig. 7.** L- and S-endoglin modify cell proliferation. (A) Proliferation was assessed by the number of cells determined by MTT assay. Cell proliferation was analyzed at day 0 (day of treatment, data not shown) and 3 days after treatment. A representative experiment of three independent experiments using quadruplicate samples is shown. (B) Representative flow cytometry graph showing a higher proportion of L-endoglin cells in S and G2-M phases of the cell cycle.

induced an increase in the collagen I expression that was higher in cells expressing ALK5 than in cells expressing ALK1 (Fig. 6C). These results indicate that ALK1 and ALK5 mediate collagen expression in L<sub>6</sub>E<sub>9</sub> cells. In addition, TGF $\beta$ 1-induced collagen I expression was reduced in the presence of SB431542 in mock, L- and S-endoglin-transfected myoblasts (Fig. 6D); however, the differences in collagen expression between the three groups are preserved.

As connective tissue growth factor (CTGF) seems to be a key mediator of the profibrotic effects of TGF $\beta$ 1 (Chen et al., 2002; Gupta et al., 2000; Riser et al., 2000), we assessed whether L- or S-endoglin could modify CTGF expression. We observed that under basal conditions, L-endoglin had lower and S-endoglin higher CTGF expression than mock cells (Fig. 6B). TGF $\beta$ 1 treatment induced a similar percentage of increase in CTGF expression in both types of cells (Fig. 6B). However, the amount of CTGF detected in L-endoglin after TGF $\beta$ 1 treatment was lesser than in mock, while S-endoglin showed a higher TGF $\beta$ 1-induced increase in CTGF than did mock L<sub>6</sub>E<sub>9</sub> cells (Fig. 6B).

#### Differential effects of L- and S-endoglin on cell proliferation

We and others have reported the effects of endoglin expression on cell proliferation in the presence or absence of TGF $\beta$ 1 (Letamendia et al., 1998; Obreo et al., 2004). Here, cells were subcultured in 24-well plates, allowed to attach for 12 hours and then treated or not with 500 pM TGF $\beta$ 1. Under these conditions, the number of cells in both mock, L- or S-endoglin after 1 day of culture was the same (data not shown). In the absence of TGF $\beta$ 1 treatment, the number of cells after 4 days of plating was higher in L-endoglin and lower in S-endoglin than in mock cells (Fig. 7A). Incubation with TGF $\beta$ 1 decreased in a similar way the number of cells in both mock, L- and S-endoglin cells (Fig. 7A). Flow cytometry analysis revealed a greater percentage of L-endoglin cells in S and G2-M phase (44.5%) than in S-endoglin (38.6%) cells (Fig. 7B). These results suggest that L-endoglin promotes, whereas S-endoglin reduces, L<sub>6</sub>E<sub>9</sub> proliferation.

#### Discussion

In the present studies, we investigated the function of L- and S-forms of endoglin on TGF $\beta$ 1 signaling pathways using the rat myoblast cell line L<sub>6</sub>E<sub>9</sub>. This is a well-established cellular model reported to be highly responsive to TGF $\beta$ 1 that, interestingly, lacks endoglin expression (Letamendia et al., 1998; Guo et al., 2004;

Obreo et al., 2004; Scherner et al., 2007). As the actual tools used to detect endoglin on tissues and primary cultured cells barely distinguish between L- and S-endoglin, this is an excellent model system with which to analyze the role of endoglin isoforms in modulating TGF $\beta$  signaling pathways by transfecting cDNA encoding L- and S-endoglin into the L<sub>6</sub>E<sub>9</sub> cells.

The effects of TGF $\beta$ 1 on target gene expression are well described and attributed to the ubiquitous signaling pathway encompassing the type I receptor ALK5, Smad2 and Smad3. The ALK1-Smad1/5 pathway has been analyzed almost exclusively in endothelial cells (Goumans et al., 2002; Lebrin et al., 2004; Lebrin et al., 2005; Blanco et al., 2005) and only recently its involvement in myoblasts has been suggested (Scherner et al., 2007). In our study, it was noted that L<sub>6</sub>E<sub>9</sub> cells express both TGF $\beta$  type I and II receptors, and show responsiveness towards TGF $\beta$ 1, as Smad1/5 and Smad2/3 (respectively) were activated. Moreover, the reporters (CAGA)<sub>12</sub>-Luc and (BRE)<sub>2</sub>-Luc were activated by TGF $\beta$ 1. In addition, we showed that TGF $\beta$ 1 induces Id1 and PAI1 expression in these cells. Our data are consistent with those from Scherner et al. (Scherner et al., 2007) showing that both ALK1- and ALK5-TGF $\beta$ 1-dependent signaling pathways are present and functional in L<sub>6</sub>E<sub>9</sub> myoblasts. One feature in ALK1 signaling is the dependence on ALK5 activity that was previously observed in ALK5-deficient endothelial cells (Goumans et al., 2003) and in L<sub>6</sub>E<sub>9</sub> cells (Scherner et al., 2007). We confirmed this characteristic in L<sub>6</sub>E<sub>9</sub> cells because TGF $\beta$ -dependent Smad2/3 and Smad1/5 phosphorylation was completely blocked in the presence of the ALK5 inhibitor SB431542, which does not interfere with ALK1 group receptors (Laping et al., 2002).

Generally, the studies regarding endoglin are referred to its predominantly expressed long isoform L-endoglin. Although L-endoglin isoform appears to be the predominant endoglin transcript expressed in mouse tissues and cell lines, significant levels of S-endoglin mRNA are co-expressed with L-endoglin in several tissues, such as liver and lung, as well as in endothelial cultured cells (Bellon et al., 1993; Perez-Gomez et al., 2005). S-endoglin rises from an alternative splicing mechanism by which a 136 bp intron between exon 12 and 13 is not eliminated. Consequently, a premature stop codon appears in the reading frame; thus, both endoglin isoforms differ by their cytoplasmic tails. Whereas the cytoplasmic region of L-endoglin contains 47 amino acids, that of S-endoglin has only 14 residues, with the seven juxtamembrane amino acids in common. Recently, it has been reported the existence of the mouse endoglin short isoform (Perez-Gomez et al., 2005), but the role of S-endoglin on TGF $\beta$  signaling pathway has not been analyzed in detail.

Our data support the view that endoglin is a modulator of the balance between TGF $\beta$ 1-ALK1 and TGF $\beta$ 1-ALK5 signaling pathways. We show that L- and S-endoglin expression increased the ALK1 signaling pathway by increasing Id1 expression in response to TGF $\beta$ 1, but the effect of L-endoglin was much higher than that of S-endoglin. This view is in agreement with reports showing that L-endoglin promotes endothelial cell proliferation via TGF $\beta$ 1-ALK1 signaling, while it interferes with the TGF $\beta$ 1/ALK5 pathway (Lebrin et al., 2004; Blanco et al., 2005). Id1 has been reported to enhance proliferation (Lin et al., 2000) and to serve as an effector for the TGF $\beta$ 1-ALK1 pathway in mediating the stimulatory effect on proliferation. Consistent with this notion, we found that TGF $\beta$ -induced decrease in proliferation is abolished in cells expressing L-endoglin and increased in cells expressing S-endoglin. Lastres et al. (Lastres et al., 1996) found similar response

on TGF $\beta$ 1-induced [ $^3$ H]-thymidine uptake in U-937 L- and S-endoglin-transfected monocytes. Besides, S-endoglin highly increased ALK5 signaling pathway that, by contrast, was reduced in L-endoglin cells. This last observation is in agreement with a large number of reports describing the role of L-endoglin as an antagonist of specific ALK5-mediated TGF $\beta$ 1 responses, including inhibition of cellular proliferation, apoptosis triggering or induction of extracellular matrix synthesis (Letamendia et al., 1998; Obreo et al., 2004; Diez-Marques et al., 2002; Li et al., 2003). It is important to note that after 3 days of serum depletion, L-endoglin increased, whereas S-endoglin decreased cell proliferation, suggesting that a TGF $\beta$ -independent pathway is implicated in this biological effect of endoglin. Because the extracellular domain of endoglin is common in both L- and S-isoforms, the cytoplasmic tails would be responsible for the antagonist effects observed.

However, in the presence of S-endoglin, L<sub>6</sub>E<sub>9</sub> cells accumulate much more collagen I and express more CTGF, while L-endoglin cells accumulate less collagen I and express less CTGF than mock-transfected cells. Furthermore, caALK5-transfected cells accumulate more collagen than do caALK1-transfected cells. These data suggest that S-endoglin expression could favor ALK5-mediated TGF $\beta$ 1 responses such as induction of extracellular matrix synthesis. Ectopic expression of L-endoglin in cell lines has been reported to modulate their responses to TGF $\beta$ 1, possibly by favoring signaling via the ALK1 pathway (Letamendia et al., 1998). Our results show that S-endoglin plays an important role in TGF $\beta$ 1 signaling in L<sub>6</sub>E<sub>9</sub> cells by increasing ALK5-PAI1 pathway while L-endoglin enhances ALK1-Id1 pathway. Studies in the human promonocytic line U-937 showed that S-endoglin transfectants produced a higher amount of extracellular matrix components such as fibronectin in response to TGF $\beta$ 1 than L-endoglin, but less than mock cells (Lastres et al., 1996). These data indicate a different pattern of cellular response modulation by TGF $\beta$ , depending on the endoglin isoform. We show that the TGF $\beta$ 1-induced collagen I synthesis occurs, in part, via upregulation of ALK1, as caALK1 increases collagen expression in L<sub>6</sub>E<sub>9</sub> cells. The short endoglin isoform is able to exert opposite effects to that of the largely expressed L-endoglin on the TGF $\beta$  signaling (Bellon et al., 1993; Perez-Gomez et al., 2005), including the positive and negative cooperation with ALK5 and ALK1, respectively. Interestingly, we have found that ALK5 and ALK1, as well as T $\beta$ RII, levels remain unchanged in L- or S-endoglin-transfected L<sub>6</sub>E<sub>9</sub> cells. Therefore, balancing the TGF $\beta$  signal through ALK5 or ALK1 would depend on the S-endoglin : L-endoglin ratio present on the cells. However, S-endoglin could not cooperate with the ALK1 signaling pathway owing to the low affinity of the interaction, thus leading the signal through ALK5. Supporting this hypothesis, an anti-angiogenic effect of S-endoglin has been recently suggested, in contrast to the pro-angiogenic role attributed to L-endoglin (Perez-Gomez et al., 2005). In S-endoglin-transfected cells without treatment, collagen I expression is higher than in mock-transfected myoblasts, thus suggesting that a TGF $\beta$ -independent pathway is involved in this biological effect of endoglin. In this regard, we show here that ALK1 inhibition reduces only the collagen synthesis induced by TGF $\beta$ 1, and we have already demonstrated the dependence of collagen I synthesis on p38 MAPK in L<sub>6</sub>E<sub>9</sub> myoblasts (Rodríguez-Barbero et al., 2002).

Taken together, our data demonstrate a different and sometimes opposed effect of L and S isoforms of endoglin on the regulation of TGF $\beta$ -induced responses and signaling in L<sub>6</sub>E<sub>9</sub> cells. Furthermore, some of the effects of the endoglin isoforms could be independent of TGF $\beta$ .

## Materials and Methods

### Cell culture

The rat myoblast cell line L<sub>6</sub>E<sub>9</sub> and their stable transfectants expressing human L-endoglin and S-endoglin were obtained and maintained as described (Letamendia et al., 1998). In brief, clone 3.3 in pUC13 was digested with *Bbr*PI and *Bam*HI. The endoglin fragment was made blunt and inserted into the mammalian expression vector pcEXV, yielding pcEXV-EndoS. The lack of leader sequence in the L-endoglin cDNA was overcome by the construction of pcEXV-EndoL. pcEXV-EndoS was digested with *Mlu*I and *Bam*HI and ligated to the 563 bp *Mlu*I-*Bam*HI fragment specific of L-endoglin cDNA, resulting in pcEXV-EndoL as previously described (Bellon et al., 1993). Myoblast transfectants were generated by co-transfecting pcEXV-EndoL or pcEXV-EndoS vectors and pSV2neo plasmid (Clontech) that contains a neomycin resistance gene at a 10:1 ratio. 10 mg of plasmid DNA were mixed with 20 mg of Lipofectin (Life Technologies) in serum-free medium according to the protocol provided by the manufacturer. Positive clones were selected in the presence of 400 mg/ml of the antibiotic G418. Parallel transfections with pSV2neo alone yielded endoglin-negative mock transfectants. Parental and transfectant cells were cultured in Dulbecco's modified Eagle's medium (DMEM) (Cambrex Bio Science) containing 10% fetal bovine serum (FBS, Gibco) and 100 U/ml of penicillin-streptomycin at 37°C in a 5% CO<sub>2</sub> atmosphere. 24 hours after plating, cells were serum starved for 24 hours and treated with the active human recombinant TGF $\beta$ 1 at 500 pM.

### Antibodies and reagents

Purified TGF $\beta$ 1 was purchased from R&D Systems. ALK5 inhibitor SB431542 was from Tocris. Antibodies against ALK5 (sc-399), ALK1 (sc-19546),  $\beta$ -actin (sc-1616), Smad1/5 (sc-7965), Smad2/3 (sc-6032), Smad4 (sc-7966), Id1 (sc-488) and CTGF (sc-14939) were from Santa Cruz Biotechnology. Antibodies against phosphorylated Smad1/5, and phosphorylated Smad2 were generated as described (Persson et al., 1998). Antibody against phosphorylated Smad1/3 (CS-9514) was from Cell Signaling. Horseradish peroxidase (HRP)-conjugated anti-rabbit IgG, anti-mouse IgG and anti-goat IgG antibodies were purchased from Santa Cruz Biotechnology. Anti- $\alpha$ -tubulin antibody was from Calbiochem, anti-T $\beta$ RII was from Upstate Biotechnology. Anti-collagen I antibody was from Chemicon. Anti-endoglin antibody was P3D1, which has been previously described (Pichuantes et al., 1997).

### RT-PCR analysis

Total RNA was isolated using NucleoSpin RNAiI (Macherey-Nagel) according to the manufacturer's instructions. First-strand cDNA was generated from 2  $\mu$ g of total RNA using poly-dT as primers with the M-MLV reverse transcriptase (Promega), 0.5 mg of cDNA were used in a standard 50 ml PCR mixture with 2 ng/ $\mu$ l of each primer and 2 U of FastStart Taq DNA polymerase (Roche). The PCR products were separated by electrophoresis on a 1% agarose gel and visualized by ethidium bromide staining. The primers were designed for specific sequences and checked by BLAST algorithm (Altschul et al., 1997).

### Western blot analysis

Western blot analysis was performed basically as described (Rodríguez-Barbero et al., 2001). Cells were lysed on ice-cold lysis buffer and protein concentrations were determined (Bradford, BioRad). Protein samples were separated by SDS-PAGE, blotted onto PVDF membranes, and incubated with the primary antibodies. After incubation with horseradish peroxidase-conjugated secondary antibodies, bands were visualized by a luminol-based detection system with p-iodophenol enhancement. Anti-tubulin and  $\beta$ -actin antibodies were used to confirm equal loading of protein in each lane. Protein expression was quantified by densitometry using Scion Image software (Scion). Some membranes were re-probed with several antibodies using a stripping solution (Chemicon) following the manufacturer's instructions.

### Immunofluorescence staining

Immunofluorescence staining was performed as described (Rodríguez-Barbero et al., 2001). Cells were plated onto glass coverslips, fixed, permeabilized and incubated with primary antibodies for 1 hour. After washing, cells were incubated with the appropriate Cy3 or Alexa Fluor 488-conjugated secondary antibodies (Jackson ImmunoResearch) for 30 minutes. Slides incubated only with the secondary antibody were used to control for non-specific binding. Cells were washed in 0.2% BSA-PBS, rinsed briefly in 2 mM Hoechst (Sigma) to stain the nuclei, and mounted with mowiol (Hoechst). Stained cells were photographed using a Zeiss fluorescence microscope (Carl Zeiss) equipped with a digital camera.

### Plasmids, transfection and luciferase reporter assay

The TGF $\beta$ -responsive vectors used as reporters were the ALK5 specific (CAGA)<sub>12</sub>-Luc (Denkler et al., 1998) and p(BRE)<sub>2</sub>-Luc that contains the crucial ALK1-specific response elements of the Id1 promoter (Korchynskiy and ten Dijke, 2002). Expression plasmids for mutant ALK5 and ALK1 have been described (Goumans et al., 2002). In luciferase assays, the expression plasmid pRL-TK vector containing the Renilla luciferase gene (Promega) and the pGLE2 and pGLE3-basic vectors served as internal controls to correct for transfection efficiency. Cells were transfected for 5 hours using jetPEI transfection reagent (Polyplus transfection) according to the manufacturer's instructions. Cells were grown in FBS-free medium for 18 hours and treated with

TGF $\beta$ 1 (500 pM) for 24 hours. Then cells were lysed for western blot or reporter assays. Luciferase and renilla activities were measured using a dual-reporter assay kit (Promega).

#### Cell proliferation assay

Subconfluent monolayer cultures were plated in 24-well plates to a density of 12,000 cells per well. 12 hours after plating, cells were serum starved and treated with TGF $\beta$ 1. Cell proliferation was analyzed after TGF $\beta$ 1 treatment by an 3-(4,5-dimethylthiazol-2-yl)-2,5-diphenyltetrazolium bromide (MTT)-based assay (Roche). Cell proliferation was measured based on absorbance at 595 nm using a Sunrise plate reader (Bio-Tek Instruments). Each experiment was performed in quadruplicate and repeated three times. The amount of color produced is directly proportional to the number of viable cells and is represented as the MTT uptake. For cell cycle studies, cells were plated in 100 mm plates, cultured for 24 hours and serum starved for an additional period of 24 hours. Then, cell cycle analysis was evaluated by flow cytometry.

#### Data analyses

All numerical data are presented as mean $\pm$ s.e.m. and were analyzed by one way ANOVA and the Student's *t*-test. The entire statistical tests were performed using SPSS 14.0 software.

S.V. and P.Á.-M. are recipients of a predoctoral fellowship from Ministerio de Educación y Ciencia. M.P. is a recipient of a predoctoral fellowship from Junta de Castilla y León. These studies have been supported by grants from Junta de Castilla y León (SA089/02), Ministerio de Educación y Ciencia (BFU2004-00285/BFI to J.M.L.-N. and SAF2004-01390 to C.B.), Instituto de Salud Carlos III (Red de Investigación en Enfermedades Renales, RD06/0016 to J.M.L.-N.), Centre for Biomedical Research on Rare Diseases, CIBERER (CB06/07/0038 CB) and Dutch Cancer Society (UL 2005-3371 to P.t.D.).

#### References

- Altschul, S. F., Madden, T. L., Schaffer, A. A., Zhang, J., Zhang, Z., Miller, W. and Lipman, D. J. (1997). Gapped BLAST and PSI-BLAST: a new generation of protein database search programs. *Nucleic Acids Res.* **25**, 3389-3402.
- Bellon, T., Corbi, A., Lastres, P., Cales, C., Cebrian, M., Vera, S., Cheifetz, S., Massague, J., Letarte, M. and Bernabeu, C. (1993). Identification and expression of two forms of the human transforming growth factor-beta-binding protein endoglin with distinct cytoplasmic regions. *Eur. J. Immunol.* **23**, 2340-2345.
- Blanco, F. J., Santibanez, J. F., Guerrero-Esteo, M., Langa, C., Vary, C. P. and Bernabeu, C. (2005). Interaction and functional interplay between endoglin and ALK1, two components of the endothelial transforming growth factor-beta receptor complex. *J. Cell. Physiol.* **204**, 574-584.
- Cheifetz, S., Bellon, T., Cales, C., Vera, S., Bernabeu, C., Massague, J. and Letarte, M. (1992). Endoglin is a component of the transforming growth factor-beta receptor system in human endothelial cells. *J. Biol. Chem.* **267**, 19027-19030.
- Chen, Y., Blom, I. E., Sa, S., Goldschmeding, R., Abraham, D. J. and Leask, A. (2002). CTGF expression in mesangial cells: Involvement of SMADs, MAP kinase, and PKC. *Kidney Int.* **62**, 1149-1159.
- David, L., Mallet, C., Vailhe, B., Lamouille, S., Feige, J. J. and Bailly, S. (2007). Activin receptor-like kinase 1 inhibits human microvascular endothelial cell migration: potential roles for JNK and ERK. *J. Cell. Physiol.* **213**, 484-489.
- Dennler, S., Itoh, S., Vivien, D., ten Dijke, P., Huet, S. and Gauthier, J. M. (1998). Direct binding of Smad3 and Smad4 to critical TGF beta-inducible elements in the promoter of human plasminogen activator inhibitor-type 1 gene. *EMBO J.* **17**, 3091-3100.
- Diez-Marques, L., Ortega-Velazquez, R., Langa, C., Rodriguez-Barbero, A., Lopez-Novoa, J. M., Lamas, S. and Bernabeu, C. (2002). Expression of endoglin in human mesangial cells: modulation of extracellular matrix synthesis. *Biochim. Biophys. Acta* **1587**, 36-44.
- Duff, S. E., Li, C., Garland, J. M. and Kumar, S. (2003). CD105 is important for angiogenesis: evidence and potential applications. *FASEB J.* **17**, 984-992.
- Gougos, A. and Letarte, M. (1990). Primary structure of endoglin, an RGD-containing glycoprotein of human endothelial cells. *J. Biol. Chem.* **265**, 8361-8364.
- Goumans, M. J., Valdimarsdottir, G., Itoh, S., Rosendahl, A., Sideras, P. and ten Dijke, P. (2002). Balancing the activation state of the endothelium via two distinct TGF-beta type I receptors. *EMBO J.* **21**, 1743-1753.
- Goumans, M. J., Valdimarsdottir, G., Itoh, S., Lebrin, F., Larsson, J., Mummery, C., Karlsson, S. and ten Dijke, P. (2003). Activin receptor-like kinase (ALK1) is an antagonistic mediator of lateral TGFbeta/ALK5 signaling. *Mol. Cell* **12**, 817-828.
- Guo, B., Rooney, P., Slevin, M., Li, C., Parameshwar, S., Liu, D., Kumar, P., Bernabeu, C. and Kumar, S. (2004). Overexpression of CD105 in rat myoblasts: role of CD105 in cell attachment, spreading and survival. *Int. J. Oncol.* **25**, 285-291.
- Gupta, S., Clarkson, M. R., Duggan, J. and Brady, H. R. (2000). Connective tissue growth factor: potential role in glomerulosclerosis and tubulointerstitial fibrosis. *Kidney Int.* **58**, 1389-1399.
- Korchynski, O. and ten Dijke, P. (2002). Identification and functional characterization of distinct critically important bone morphogenetic protein-specific response elements in the Id1 promoter. *J. Biol. Chem.* **277**, 4883-4891.
- Laping, N. J., Grygielko, E., Mathur, A., Butter, S., Bomberger, J., Tweed, C., Martin, W., Fornwald, J., Lehr, R., Harling, J. et al. (2002). Inhibition of transforming growth factor (TGF)-beta1-induced extracellular matrix with a novel inhibitor of the TGF-beta type I receptor kinase activity: SB-431542. *Mol. Pharmacol.* **62**, 58-64.
- Lastres, P., Martin-Perez, J., Langa, C. and Bernabeu, C. (1994). Phosphorylation of the human-transforming-growth-factor-beta-binding protein endoglin. *Biochem. J.* **301**, 765-768.
- Lastres, P., Letamendia, A., Zhang, H., Rius, C., Almendro, N., Raab, U., Lopez, L. A., Langa, C., Fabra, A., Letarte, M. et al. (1996). Endoglin modulates cellular responses to TGF-beta 1. *J. Cell Biol.* **133**, 1109-1121.
- Lebrin, F., Goumans, M. J., Jonker, L., Carvalho, R. L., Valdimarsdottir, G., Thorikay, M., Mummery, C., Arthur, H. M. and ten Dijke, P. (2004). Endoglin promotes endothelial cell proliferation and TGF-beta/ALK1 signal transduction. *EMBO J.* **23**, 4018-4028.
- Lebrin, F., Deckers, M., Bertolino, P. and ten Dijke, P. (2005). TGF-beta receptor function in the endothelium. *Cardiovasc. Res.* **65**, 599-608.
- Letamendia, A., Lastres, P., Botella, L. M., Raab, U., Langa, C., Velasco, B., Attisano, L. and Bernabeu, C. (1998). Role of endoglin in cellular responses to transforming growth factor-beta. A comparative study with betaglycan. *J. Biol. Chem.* **273**, 33011-33019.
- Li, C., Issa, R., Kumar, P., Hampson, I. N., Lopez-Novoa, J. M., Bernabeu, C. and Kumar, S. (2003). CD105 prevents apoptosis in hypoxic endothelial cells. *J. Cell Sci.* **116**, 2677-2685.
- Lin, C. Q., Singh, J., Murata, K., Itahana, Y., Parrinello, S., Liang, S. H., Gillett, C. E., Campisi, J. and Desprez, P. Y. (2000). A role for Id-1 in the aggressive phenotype and steroid hormone response of human breast cancer cells. *Cancer Res.* **60**, 1332-1340.
- Massague, J. (2000). How cells read TGF-beta signals. *Nat. Rev. Mol. Cell Biol.* **1**, 169-178.
- Massague, J. and Gomis, R. R. (2006). The logic of TGFbeta signaling. *FEBS Lett.* **580**, 2811-2820.
- Obreo, J., Diez-Marques, L., Lamas, S., Duwell, A., Eleno, N., Bernabeu, C., Pandiella, A., Lopez-Novoa, J. M. and Rodriguez-Barbero, A. (2004). Endoglin expression regulates basal and TGF-beta1-induced extracellular matrix synthesis in cultured L6E9 myoblasts. *Cell. Physiol. Biochem.* **14**, 301-310.
- Perez-Gomez, E., Eleno, N., Lopez-Novoa, J. M., Ramirez, J. R., Velasco, B., Letarte, M., Bernabeu, C. and Quintanilla, M. (2005). Characterization of murine S-endoglin isoform and its effects on tumor development. *Oncogene* **24**, 4450-4461.
- Persson, U., Izumi, H., Souchelnytskyi, S., Itoh, S., Grimsby, S., Engström, U., Heldin, C. H., Funah, K. and ten Dijke, P. (1998). The L45 loop in type I receptors for TGF-beta family members is a critical determinant in specifying Smad isoform activation. *FEBS Lett.* **434**, 83-87.
- Pichuanes, S., Vera, S., Bourdeau, A., Pece, N., Kumar, S., Wayner, E. A. and Letarte, M. (1997). Mapping epitopes to distinct regions of the extracellular domain of endoglin using bacterially expressed recombinant fragments. *Tissue Antigens* **50**, 265-276.
- Piek, E., Heldin, C. H. and ten Dijke, P. (1999). Specificity, diversity, and regulation in TGF-beta superfamily signaling. *FASEB J.* **13**, 2105-2124.
- Riser, B. L., Denichilo, M., Cortes, P., Baker, C., Grondin, J. M., Yee, J. and Narins, R. G. (2000). Regulation of connective tissue growth factor activity in cultured rat mesangial cells and its expression in experimental diabetic glomerulosclerosis. *J. Am. Soc. Nephrol.* **11**, 25-38.
- Rodriguez-Barbero, A., Obreo, J., Eleno, N., Rodriguez-Pena, A., Duwell, A., Jerkic, M., Sanchez-Rodriguez, A., Bernabeu, C. and Lopez-Novoa, J. M. (2001). Endoglin expression in human and rat mesangial cells and its upregulation by TGF-beta1. *Biochem. Biophys. Res. Commun.* **282**, 142-147.
- Rodriguez-Barbero, A., Obreo, J., Yuste, L., Montero, J. C., Rodriguez-Pena, A., Pandiella, A., Bernabeu, C. and Lopez-Novoa, J. M. (2002). Transforming growth factor-beta1 induces collagen synthesis and accumulation via p38 mitogen-activated protein kinase (MAPK) pathway in cultured L6E9 myoblasts. *FEBS Lett.* **513**, 282-288.
- Schnerer, O., Meurer, S. K., Tihaa, L., Gressner, A. M. and Weiskirchen, R. (2007). Endoglin differentially modulates antagonistic transforming growth factor-beta1 and BMP-7 signaling. *J. Biol. Chem.* **282**, 13934-13943.
- Shi, Y. and Massague, J. (2003). Mechanisms of TGF-beta signaling from cell membrane to the nucleus. *Cell* **113**, 685-700.
- Yamashita, H., Ichijo, H., Grimsby, S., Moren, A., ten Dijke, P. and Miyazono, K. (1994). Endoglin forms a heteromeric complex with the signaling receptors for transforming growth factor-beta. *J. Biol. Chem.* **269**, 1995-2001.
